# Comparing Sources of Mobility for Modelling the Epidemic Spread of Zika Virus in Colombia

Daniela Perrotta<sup>1,\*</sup>, Enrique Frias-Martinez<sup>2</sup>, Ana Pastore y Piontti<sup>3</sup>, Qian Zhang<sup>3</sup>, Miguel Luengo-Oroz<sup>4</sup>, Daniela Paolotti<sup>5</sup>, Michele Tizzoni<sup>5</sup>, and Alessandro Vespignani<sup>3</sup>

<sup>1</sup>Laboratory of Digital and Computational Demography, Max Planck Institute for Demographic Research, Rostock, Germany

<sup>2</sup>Telefonica Research, Madrid, Spain

<sup>3</sup>Laboratory for the Modeling of Biological and Socio-technical Systems, Northeastern University, Boston, MA, USA

<sup>4</sup>United Nations Global Pulse, New York, USA

<sup>5</sup>ISI Foundation, Turin, Italy

\*corresponding author: perrotta@demogr.mpg.de

## Abstract

Timely, accurate, and comparative data on human mobility is of paramount importance for epidemic preparedness and response, but generally not available or easily accessible. Mobile phone metadata, typically in the form of Call Detail Records (CDRs), represents a powerful source of information on human movements at an unprecedented scale. In this work, we investigate the potential benefits of harnessing aggregated CDR-derived mobility to predict the 2015-2016 Zika virus (ZIKV) outbreak in Colombia, when compared to other traditional data sources. To simulate the spread of ZIKV at sub-national level in Colombia, we employ a stochastic metapopulation epidemic model for vector-borne disease. Our model integrates detailed data on the key drivers of ZIKV spread, including the spatial heterogeneity of the mosquito abundance, and the exposure of the population to the virus due to environmental and socio-economic factors. Given the same modelling settings (i.e. initial conditions and epidemiological parameters), we perform in-silico simulations for each mobility network and assess their ability in reproducing the local outbreak as reported by the official surveillance data. We assess the performance of our epidemic modelling approach in capturing the ZIKV outbreak both nationally and sub-nationally. Our model estimates are strongly correlated with the surveillance data at the country level (Pearson's  $r=0.92$  for the CDR-informed network). Moreover, we found strong performance of the model estimates generated by the CDR-informed mobility network in reproducing the local outbreak observed at the sub-national level. Compared to the CDR-informed network, the performance of the other mobility networks is either comparatively similar or substantially lower, with no added value in predicting the local epidemic. This suggests that mobile phone data capture a better picture of human mobility patterns. This work contributes to the ongoing discussion on the value of aggregated mobility estimates from CDRs data that, with appropriate data protection and privacy

NOTE: This preprint reports new research that has not been certified by peer review and should not be used to guide clinical practice.

## 40 1 Introduction

41 In 2015-2016, a large-scale outbreak of Zika virus (ZIKV) infection affected the Americas and  
42 the Pacific. The epidemic was first confirmed in Brazil in May 2015 and rapidly reached a  
43 total of 50 countries and territories through the end of 2016 [1]. ZIKV infection is typically  
44 accompanied by mild illness, but following the increased incidence of neurological complications,  
45 including microcephaly in newborns and Guillain-Barré syndrome, the WHO declared a Public  
46 Health Emergency of International Concern (PHEIC) [2] in February 2016, which lasted for  
47 nearly 10 months.

48 First isolated in the Zika forest of Uganda in 1947, ZIKV is primarily transmitted by infected  
49 *Aedes* mosquitoes [3, 4], also responsible for transmitting other infectious diseases, including  
50 dengue, chikungunya, and yellow fever. Other ways of transmission have been reported, such as  
51 sexual and perinatal transmission [5, 6, 7, 8] and blood transmission through blood transfusion  
52 [9]. The likelihood of sustained local transmission of ZIKV is therefore fuelled by the presence of  
53 *Aedes* mosquitoes, whose spatial heterogeneity and seasonal variability are in turn regulated by  
54 the local environment and climate [10]. Since mosquitoes cannot fly too far, but tend to spend  
55 their lifetime around where they emerge, human population movement is likely responsible for  
56 ZIKV introduction to new regions with favourable local conditions for mosquitoes proliferation  
57 and sustained disease transmission [11].

58 Human mobility is in fact a key driver of ZIKV spread as well as of several infectious diseases,  
59 increasing the disease prevalence by introducing new pathogens into susceptible populations,  
60 or by increasing social contacts between susceptible and infected individuals [12]. Timely,  
61 accurate, and comparative data on human mobility is therefore of paramount importance for  
62 epidemic preparedness and response, but generally not available or easily accessible. Traditional  
63 data, typically collected from censuses, is often inadequate due to lack of spatial and temporal  
64 resolution, or may be completely unavailable in developing countries. Mathematical models,  
65 such as the gravity model of migration or the radiation model, represent an alternative to  
66 overcome scarcity of traditional data by synthetically quantifying mobility patterns at different  
67 scale. However, more detailed data on mixing patterns is generally needed to capture the  
68 spatio-temporal fluctuations in disease incidence [13, 14].

69 The recent availability of large amounts of geolocated datasets have revolutionized research  
70 in this field, enabling to quantitatively study individual and collective mobility patterns as  
71 generated by human activities in their daily life [15]. In this context, mobile phone metadata,  
72 typically in the form of Call Detail Records (CDRs), represents a powerful source of informa-  
73 tion on human movements. Created by telecom operators for billing purposes and summarising  
74 mobile subscribers' activity (e.g. phone calls, text messages and data connections), CDRs rep-  
75 represents a relatively low-cost resource to draw a high-level picture of human mobility patterns at  
76 an unprecedented scale [12]. The availability of aggregated CDR-derived mobility has impacted  
77 several research fields [16], with significant applications to the spatial modelling of many infec-  
78 tious diseases, such as malaria [17, 18], dengue [19], cholera [20], rubella [21], Ebola [22, 23],  
79 and COVID-19 [24, 25, 26, 27, 28].

80 In this study, we investigate the potential benefits of harnessing CDRs data to predict the  
81 spatio-temporal spread of Zika virus in Colombia, at sub-national level, during the 2015-2016  
82 outbreak in the Americas [29]. We assess the potential improvement in predictive power of  
83 integrating aggregated cell phone-derived population movements into a spatially structured  
84 epidemic model, when compared to more traditional methods (e.g. census data and mobility  
85 models). For this, we examine different sources of human mobility, including i) CDRs data,  
86 derived from more than two billion encrypted and anonymized calls made by around seven

87 million mobile phone users in Colombia over a six-month period between December 2013 and  
88 May 2014 [30]; ii) the traditional data of commuting patterns from the 2005 Colombian census  
89 [31]; iii) the gravity model, which assumes that the number of trips increases with population  
90 size and decreases with distances [32]; and iv) the radiation model, which assumes that the  
91 mobility depends on population density [33]. After examining their ability to match the census  
92 patterns from a network's point of view, we examine whether the observed discrepancies between  
93 networks affect the epidemic outcomes. To this end, we employ a metapopulation epidemic  
94 model to simulate the spatial spread of Zika virus as governed by the transmission dynamics  
95 of the virus through human-mosquito interactions and as promoted by population movements  
96 across the country. Given the same modelling settings (e.g. initial infections, epidemiological  
97 parameters), we perform in-silico simulations of the spatio-temporal progression of the epidemic  
98 and evaluate the human mobility patterns relevant to predicting the spread of ZIKV infections in  
99 Colombia. In more detail, here we follow the state-of-the-art computational modelling approach  
100 of the Global Epidemic and Mobility Model (GLEAM) [34] in the analysis of the epidemic  
101 spread of Zika virus in the Americas developed by Zhang et al. [35]. Our epidemic model  
102 integrates detailed data on spatial and seasonal heterogeneity driven by the presence of the  
103 vector and the exposure of the population to the vector itself due to socio-economic factors.  
104 This is because sustained local transmission of Zika virus is possible only in those areas where  
105 the local environment and climate favour the proliferation of mosquitoes [10], but at the same  
106 time the socio-economic factors modulate the exposure of the population to the vector itself,  
107 even when the environmental conditions are suitable for the transmission of the virus.

108 In the absence of accurate data on the introduction of Zika virus in Colombia and following  
109 the evidence that many ZIKV infections were likely imported into Colombia throughout the  
110 epidemic [36], we use the simulation output of the computational model (GLEAM) developed  
111 by Zhang et al. [35] as initialization of our epidemic model. In particular, Zhang et al. [35]  
112 showed that ZIKV was likely introduced to Brazil between August 2013 and April 2014 (90%  
113 credible interval), in agreement with the genetic findings. The transmission of ZIKV in the  
114 Americas was in fact first confirmed in May 2015 in northeast Brazil, but epidemiological and  
115 genetic findings estimated that ZIKV arrived in Brazil much earlier, between October 2013 and  
116 April 2014 [37]. After that, ZIKV was likely introduced to Colombia between January and  
117 April 2015 [36], that is 6 to 9 months before the ZIKV outbreak was officially declared by the  
118 Colombian National Institute of Health in October 2015. Traditional disease monitoring was  
119 therefore not sufficient to capture the initial spread of infections in Colombia. Leveraging on  
120 such global approach allows us to inform our epidemic model with the travel-associated ZIKV  
121 infections entering Colombia, and potentially triggering local ZIKV transmission, to ultimately  
122 assess the impact of internal mobility patterns in predicting the spatio-temporal dynamics of  
123 ZIKV transmission in Colombia.

## 124 **2 Materials and Methods**

### 125 **2.1 Epidemiological data**

126 We use weekly epidemiological reports from the Colombian National Institute of Health (INS)  
127 [38] that document the cumulative number of laboratory-confirmed and suspected cases of Zika  
128 virus disease by departments and districts (i.e. the major cities of Barranquilla, Buenaventura,  
129 Cartagena, and Santa Marta). Reports are accessible at the following URL: <http://www.ins.gov.co/buscadoreventos/BoletinEpidemiologico/Forms/AllItems.aspx>.

131 From this, we computed the weekly number of new ZIKV cases by department for the

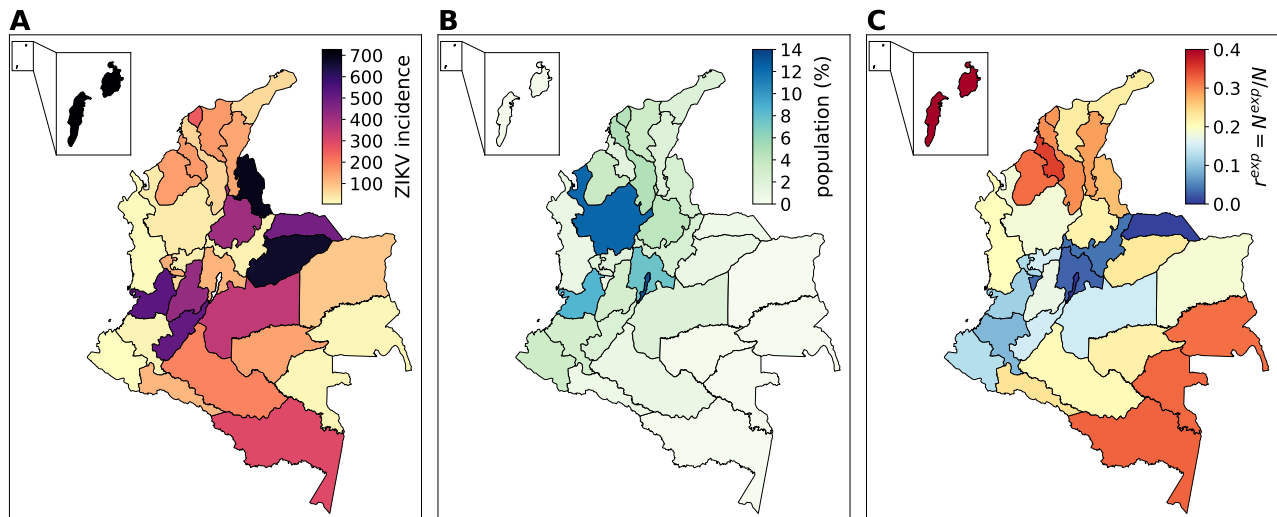

**Fig. 1. Data layers by Colombian department.** (A) Cumulative ZIKV incidence (per 100,000 population) reported by Colombia's National Institute of Health in the period from October 4, 2015 (epidemiological week 2015-40) to October 2, 2016 (epidemiological week 2016-40). (B) Population estimates by department. Population is mainly concentrated in the northern and western part of the country, where most of the urban centres are located, whereas the southern and eastern parts of Colombia are mostly sparsely inhabited. (C) Fraction of population exposed to ZIKV due to environmental and socio-economic conditions (more details in Section 4.1 of the Supplementary Material).

132 entire epidemic period, from the earliest reported cases in epidemiological week 2015-40 to  
133 epidemiological week 2016-40 (note that the INS declared the end of the epidemic on July 25,  
134 2016, in week 2016-30). The incidence data reported by district was included in the total number  
135 for the corresponding department. Due to the lack of data in the 2015-47 epidemiological report,  
136 suspected cases are calculated by interpolation. Note that the INS did not report the incidence  
137 in the Capital District, Bogotá, since most of the cases in the city originated in other reporting  
138 areas.

139 With over 100,000 cases reported (of which approximately 8% laboratory confirmed), Colom-  
140 bia had the second highest number of reported cases among the 50 countries with autochthonous  
141 transmission during the 2015-2016 outbreak in the Americas. Data profiles by department of  
142 Colombia are reported in Table S1 in the Supplementary Material. Figure 1A shows the cum-  
143 ulative incidence of Zika virus cases per 100,000 population. The most affected areas were  
144 the departments of San Andres (727 cases/100,000), Norte De Santander (692 cases/100,000),  
145 and Casanare (670 cases/100,000). Note that underreporting due to the clinical similarities  
146 of mild symptoms associated with Zika, limited diagnostic capabilities, medically unattended  
147 cases, and asymptomatic infections (ranging from 50% to 80% [39, 40]), may have contributed  
148 significantly to underestimating the actual extent of the epidemic.

## 149 2.2 Measuring human mobility in Colombia

150 In this study, we examine different sources of human mobility in Colombia, including the i)  
151 CDR-informed mobility, ii) traditional census data, and iii) mathematical mobility models.  
152 From this, we create four different mobility networks of daily population movements between  
153 the 33 departments of Colombia. Note that, since we use a Markovian dynamics to model  
154 the migration process in the epidemic model (more details in Section 2.3), we symmetrize the

155 flows in each mobility network by averaging flows  $w_{ij}$  and  $w_{ji}$  (missing links are treated as null  
156 values, i.e.  $w_{ij} = 0$ ).

157 Population data is obtained from the database of the Gridded Population of the World  
158 project from the Socioeconomic Data and Application Center at Columbia University (SEDAC),  
159 consisting of population estimates in 2015 per grid-cell 1kmx1km ([sedac.ciesin.columbia.edu](http://sedac.ciesin.columbia.edu)).  
160 Figure 1B shows the distribution of population estimates by department.

### 161 2.2.1 CDR-informed mobility network

162 We use aggregated mobile phone data obtained from more than two billion encrypted and  
163 anonymized metadata calls made over a six-month period, from December 2, 2013 to May 19,  
164 2014. The data consists of weekly origin-destination (OD) matrices of number of trips  $T_{ij}^w$   
165 from municipality  $i$  to municipality  $j$  occurred in week  $w$  and weekly number of active phone  
166 numbers  $n_i^w$  in municipality  $i$  in week  $w$ , where  $w$  goes from calendar week 2013-49 to calendar  
167 week 2014-21. Note that this data therefore do not refer to daily commuting patterns based on  
168 users' most frequently visited locations, but comprise all type of movements. However, given  
169 the long observation period and large operator coverage, we assume that potential variability  
170 due to long-distance travels, weekly and/or seasonal fluctuations, major vacation periods, etc.,  
171 are smoothed when considering average values.

172 From this, we generate the CDR-informed mobility network at the spatial resolution of  
173 departments, hereafter referred to as  $w_{ij}^{CDR}$ , by averaging values over time and normalizing flows  
174 to match the same population size. In particular, we employ a standard weighting approach  
175 and compute weights based on the population sampling ratio  $n_i/N_i^w$  in location  $i$ , where  $N_i$  is  
176 the resident population (see Figure S2 in the Supplementary Material). This way we correct for  
177 potential biases due to under- or over-sampling of the population, although population samples  
178 already show good agreement (Spearman's  $\rho=0.87$ ,  $p < 0.01$ ). More details are provided in  
179 Section 2 of the Supplementary Material.

### 180 2.2.2 Census network

181 Commuting data refers to the 2005 Colombian census of the National Institute of Statistics [31].  
182 The data is in the form of an OD matrix of daily population movements between municipalities.  
183 We aggregate flows spatially into departments and rescale them to reflect the 2015 population  
184 estimates. In the following, we will refer to the census network as  $w_{ij}^C$ . Note that although this  
185 dataset is not recent and comprises only the commuting patterns, we will use it as a reference  
186 when comparing the various mobility networks.

### 187 2.2.3 Synthetic mobility networks

188 We create synthetic mobility networks using two mathematical mobility models, namely the  
189 gravity model [32] and the radiation model [33].

190 The gravity model assumes that the flows  $w_{ij}$  of individuals travelling from location  $i$  with  
191 population  $N_i$  to location  $j$  with population  $N_j$  placed at distance  $d_{ij}$  take the following form  
192 [32]:

$$w_{ij}^G = C \frac{N_i^\alpha N_j^\gamma}{f(d_{ij})} \quad (1)$$

193 where  $C$  is a proportionality constant,  $\alpha$  and  $\gamma$  tune the dependence with respect to each  
194 location size, and  $f(d_{ij})$  is a distance-dependent function. By applying a multivariate linear

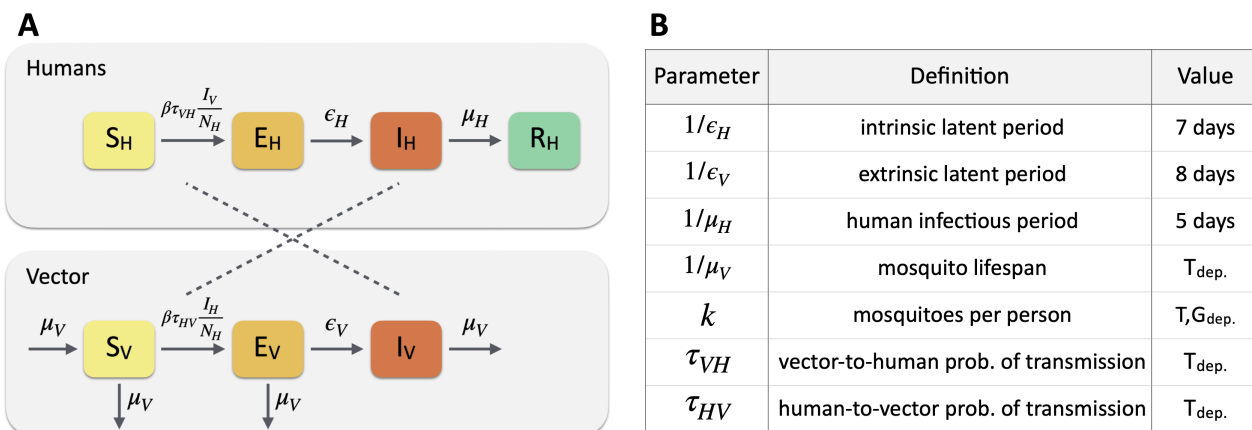

**Fig. 2. Epidemic modelling framework.** (A) The disease dynamics occurs according to a compartmental classification for ZIKV infection. Humans follows a susceptible-exposed-infectious-removed (SEIR)<sub>H</sub> classification, whereas mosquitoes follow a susceptible-exposed-infectious (SEI)<sub>V</sub>. The transmission dynamics of ZIKV occurs through the interaction between susceptible humans  $S_H$  and infected mosquitoes  $I_V$ , and between infected humans  $I_H$  and susceptible mosquitoes  $S_V$ . (B) Summary of epidemiological parameters:  $T_{dep.}$  denotes parameters that are temperature-dependent.  $T, G_{dep.}$  denotes parameters that are temperature- and geolocation-dependent. Specific values for the parameters can be found in Refs. [35, 41, 42, 43]

195 regression analysis in the logarithmic scale, we estimate the free parameters in Eq. (1) that  
 196 best fit the census data (see Table S2 in the Supplementary Material).

197 In the radiation model, instead, the flows  $w_{ij}$  take the following form [33]:

$$w_{ij}^R = T_i \frac{N_i N_j}{(N_i + s_{ij})(N_j + s_{ij})} \quad (2)$$

198 where  $N_i$  is the population living at origin  $i$ ,  $N_j$  is the population living at destination  $j$ ,  $s_{ij}$   
 199 is the total population living in a circle of radius  $d_{ij}$  centred at  $i$ , excluding the populations  
 200 of origin and destination locations, and  $T_i$  is the total outflow from  $i$  (i.e.  $\sum_{j \neq i} w_{ij}$ ). The  
 201 radiation model is parameter-free (i.e. it does not require regression analysis or fit on existing  
 202 data), it only requires the estimate of the total number of travellers  $T_i$  from the census data.

203 Given these quantities, we apply the gravity law of Eq. (1) and the radiation law of Eq. (2)  
 204 on a fully connected synthetic network, whose nodes correspond to the Colombian departments,  
 205 thus yielding the flows  $w_{ij}^G$  and  $w_{ij}^R$ , respectively.

## 206 2.3 Modelling the epidemic spread of ZIKV in Colombia

207 We employ a stochastic metapopulation epidemic model to simulate the spatial spread of ZIKV  
 208 at sub-national level in Colombia as governed by the transmission dynamics through human-  
 209 mosquito interactions and population movements across the country. In this work we largely  
 210 follow the state-of-the-art modelling approach of the Global Epidemic and Mobility Model  
 211 (GLEAM) [34] in the analysis of the 2015-2016 ZIKV epidemic in the Americas developed  
 212 by Zhang et al. [35]. In this section, we present the conceptual framework while a detailed  
 213 description is provided in Section 4 of the Supplementary Material.

214 Figure 2A describes the epidemic modelling framework. In the metapopulation structure,  
 215 the 33 departments of Colombia represent the subpopulations which are coupled by weighted

216 links based on each mobility network considered in this study. The migration process among  
217 subpopulations is modelled with a Markovian dynamics, representing individuals who are in-  
218 distinguishable regarding their travel pattern, so that at each time step the same travelling  
219 probability applies to all individuals without having memory of their origin [44]. No other type  
220 of movement is considered. The infection dynamics occurs in homogeneous mixing approxima-  
221 tion within each subpopulation according to a compartmental classification of the individuals  
222 based on the various stages of the disease. Specifically, humans are classified according to  
223 a susceptible-exposed-infectious-removed (SEIR)<sub>H</sub> compartmental model, whereas mosquitoes  
224 follow a susceptible-exposed-infectious (SEI)<sub>V</sub> compartmental model.

225 The model is fully stochastic and transitions among compartments are simulated through  
226 chain binomial processes. The transmission dynamics of the virus occurs through the interaction  
227 between i) susceptible humans  $S_H$  and infected mosquitoes  $I_V$  under the vector-to-human force  
228 of infection  $\lambda_{VH}$ , and ii) infected humans  $I_H$  and susceptible mosquitoes  $S_V$  under the human-  
229 to-vector force of infection  $\lambda_{HV}$ . We neglect the secondary routes of transmission, e.g. perinatal  
230 or blood transmission. The force of infection follows the usual mass-action law, given by the  
231 expressions  $\lambda_{VH} = \beta\tau_{VH}\frac{I_V}{N_H}$  and  $\lambda_{HV} = \beta\tau_{HV}\frac{I_H}{N_H}$ , where  $\beta$  accounts for the daily mosquito  
232 biting rate and the specific transmissibility of ZIKV, and  $\tau_{VH}$  and  $\tau_{HV}$  correspond to the  
233 probability of transmission mosquito-to-human and human-to-mosquito, respectively.

234 The remaining transitions between compartments occur spontaneously. Exposed individuals  
235  $E_H$  become infectious at a rate  $\epsilon_H$  and infectious individuals  $I_H$  recover from the disease at a rate  
236  $\mu_H$ , inversely proportional to the mean infectious period,  $\mu_H^{-1}$ . Similarly, exposed mosquitoes  
237  $E_V$  become infectious at a rate  $\epsilon_V$  and die at a rate  $\mu_V$ , inversely proportional to the mosquito  
238 lifespan  $\mu_V^{-1}$ . Mosquitoes are re-introduced in the susceptible compartment at the same rate  
239 to allow the replenishment of mosquitoes after death. Figure 2B reports a summary of the  
240 epidemiological parameters that intervene in the model, accounting for the key drivers of ZIKV  
241 transmission, such as temperature and mosquito abundance. These are also used to identify  
242 those areas where ZIKV outbreaks are not possible due to environmental factors. Moreover,  
243 data on the GDP per capita is used to model the socio-economic heterogeneity and its impact  
244 on the population's risk of exposure to mosquitoes. Population is therefore assigned a rescaling  
245 factor  $r_{se}$  modulating its exposure to the vector based on local socio-economic conditions. Figure  
246 1C shows the fraction of the population exposed to ZIKV due to environmental and socio-  
247 economic conditions. More details are reported in Section 4 of the Supplementary Material.

248 In the absence of accurate data on the introduction of Zika virus in Colombia and following  
249 the evidence that many ZIKV infections were likely imported into Colombia throughout the  
250 epidemic [36], we use the simulation output of the computational model (GLEAM) developed  
251 by Zhang et al. [35] as initialization of our epidemic model. Following the approach by Sun et  
252 al. [45], we extract the travel-associated ZIKV infections entering Colombia as stochastically  
253 simulated by GLEAM. This results in a total of 1,189 simulated ZIKV epidemics for which  
254 we know the time of arrival, the stage of ZIKV infection (exposed or infectious), and the  
255 airport of origin and arrival. Figure S7 in the Supplementary Material shows the time-series  
256 boxplot of Zika virus imported cases, along with the main countries of origin and departments  
257 of destination in Colombia. The daily number of ZIKV introductions has a median value of 10  
258 cases (IQR: 3-21) for a total of 8,671 cases (IQR: 8,315-9,064) imported into Colombia during  
259 the entire epidemic period. Note that the same rescaling factor due to environmental and  
260 socio-economic conditions applies to the imported ZIKV infections such that the likelihood of  
261 seeding an epidemic locally varies depending on whether the subpopulation of destination is at  
262 risk or not of ZIKV transmission. This is evident in Figure S8 of the Supplementary Material  
263 that shows the average daily ZIKV introductions and its proportion rescaled by the overall

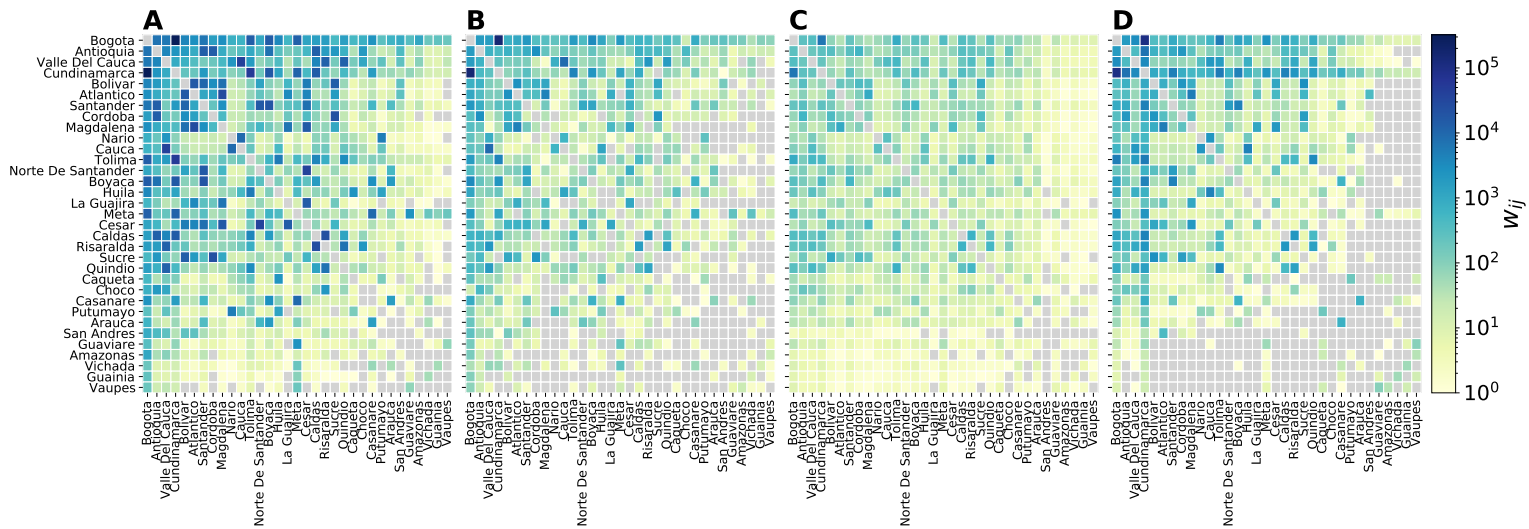

**Fig. 3. Mobility networks.** Origin-destination matrices of the flows  $w_{ij}$  among Colombian departments in the CDR-informed network (A), the census network (B), the gravity network (C), and the radiation network (D). The colour code represents the weights  $w_{ij}$  on links  $ij$  (grey indicates no movement). Departments are sorted according to population size.

264 exposure to the vector.

265 We generate 100,000 stochastic realizations using discrete time steps of one full day starting  
 266 on January 1, 2015. At each iteration, we randomly sample one simulated time-series of ZIKV  
 267 imported cases among the 1,189 simulations and use it as seeding of our epidemic model. The  
 268 process is repeated for each mobility network under study, so that, given the same modelling  
 269 settings (i.e. initial conditions and epidemiological parameters), we can assess their performance  
 270 in predicting the Zika virus outbreak in Colombia.

271 Data analysis was performed with Python (version 3.7). The code of the epidemic model  
 272 was written in object-oriented C++ for computational efficiency and the simulations were  
 273 performed in parallel on a high-performance computing cluster of 11 cores (146 nodes).

## 274 3 Results

### 275 3.1 Comparing sources of human mobility in Colombia

276 Figure 3 shows the mobility networks in form of origin-destination matrices as obtained from the  
 277 CDR-informed network (A), the census network (B), the gravity network (C), and the radiation  
 278 network (D). All networks share the same number of nodes (i.e. Colombian departments), but  
 279 with significant variations in the number of weighted links and total volume of travellers (Table  
 280 1). The gravity network has the largest number of links and fully connected nodes, whereas the  
 281 CDR-informed network has the largest number of travellers. The heatmaps show also that the  
 282 flows  $w_{ij}$  decrease with population size. This is particularly evident in the radiation network  
 283 (Figure 3D) as the model assumes that mobility depends on population density, thus penalizing  
 284 those departments that are less populated. On the other hand, the gravity network (Figure 3C)  
 285 is highly connected with smaller flows even with more distant and less populated departments.  
 286 Flows generally decrease with distance (see Figure S6 in the Supplementary Material). In all  
 287 networks, the highest flow occurs between the Capital District Bogotá and the near department  
 288 of Cundinamarca, which is approximately 57 km distant, and concerns most of the commuting



**Table 1. Basic properties of the mobility networks.** The table reports the total number of nodes and links, the number of links shared with the census network, and the total volume of travellers of each mobility network under study. Self-loops are excluded.

| Network        | No. nodes | No. links | No. shared links (%) | Volume    |
|----------------|-----------|-----------|----------------------|-----------|
| $w_{ij}^C$     | 33        | 760       | -                    | 494,234   |
| $w_{ij}^{CDR}$ | 33        | 972       | 742 (97.63)          | 2,005,992 |
| $w_{ij}^G$     | 33        | 1,006     | 754 (99.21)          | 71,871    |
| $w_{ij}^R$     | 33        | 736       | 642 (84.47)          | 457,737   |

**Table 2. Statistical comparison of the mobility networks against the census network.** The table reports the values of Kendall’s  $\tau$  and Spearman’s  $\rho$  correlation coefficients (computed both on flows  $w_{ij}$  and outflows  $\sum_i w_{ij}$ ), the Jaccard index, the cosine similarity, and the common part of commuters (CPC). All p-values are statistically significant ( $p < 0.01$ ).

| Network        | Kendall $\tau$ |                 | Spearman’s $\rho$ |                 | Jaccard | Cosine     | CPC  |
|----------------|----------------|-----------------|-------------------|-----------------|---------|------------|------|
|                | $w_{ij}$       | $\sum_i w_{ij}$ | $w_{ij}$          | $\sum_i w_{ij}$ | Index   | Similarity |      |
| $w_{ij}^{CDR}$ | 0.70           | 0.77            | 0.88              | 0.92            | 0.75    | 0.97       | 0.39 |
| $w_{ij}^G$     | 0.60           | 0.73            | 0.78              | 0.89            | 0.75    | 0.92       | 0.22 |
| $w_{ij}^R$     | 0.58           | 0.81            | 0.77              | 0.95            | 0.75    | 0.99       | 0.69 |

289 pattern. In general, higher rates of mobility mainly concern the northern and western part  
 290 of the country, where most of the urban centres are located, whereas lower rates of mobility  
 291 concern instead the southern and eastern parts, which are mostly sparsely inhabited (see maps  
 292 in Figure S5 in the Supplementary Material).

293 Restricting the analysis to the topological intersection of the mobility networks and the  
 294 census network, we analyse the structural and flows properties of the networks. Table 2 reports  
 295 the similarity metrics of the mobility networks compared to the census network (definitions are  
 296 reported in Section 5 of the Supplementary Material). Considering the topology of the networks  
 297 in terms of shared links compared to the total number of links, the Jaccard index is 0.75 for all  
 298 mobility networks. However, when considering the weights  $w_{ij}$ , the common part of commuters  
 299 (CPC) varies significantly across networks, ranging from 0.22 for the gravity network to 0.69  
 300 for the radiation network. Finally, the cosine similarity is a measure of similarity that takes  
 301 into account both links and weights shared by two networks, and this ranges from 0.92 for the  
 302 gravity network to 0.99 for the radiation network.

303 Figure 4 shows the flows  $w_{ij}$  as compared to the flows  $w_{ij}^C$  of the census network. Flows in the  
 304 CDR-informed network are generally larger than in the census network. Correlation between  
 305 flows  $w_{ij}$  is highest for the CDR-informed network, with Kendall’s  $\tau=0.70$  and Spearman’s  
 306  $\rho=0.88$ , while we found weaker correlations for the radiation network ( $\tau=0.58$ ,  $\rho=0.77$ ). When  
 307 considering the outflows  $\sum_i w_{ij}$ , the radiation network shows instead the highest correlations  
 308 ( $\tau=0.81$ ,  $\rho=0.95$ ) as the total volume of travellers match the volume in the census network.

### 309 3.2 Comparing the mobility networks in the epidemic outcome

310 Stochastic realisations obtained from our epidemic model (run separately for each mobility net-  
 311 work) define the model output used to provide the spatio-temporal patterns of ZIKV spread in  
 312 Colombia and assess the potential benefits of using CDR-derived mobility. From this stochastic

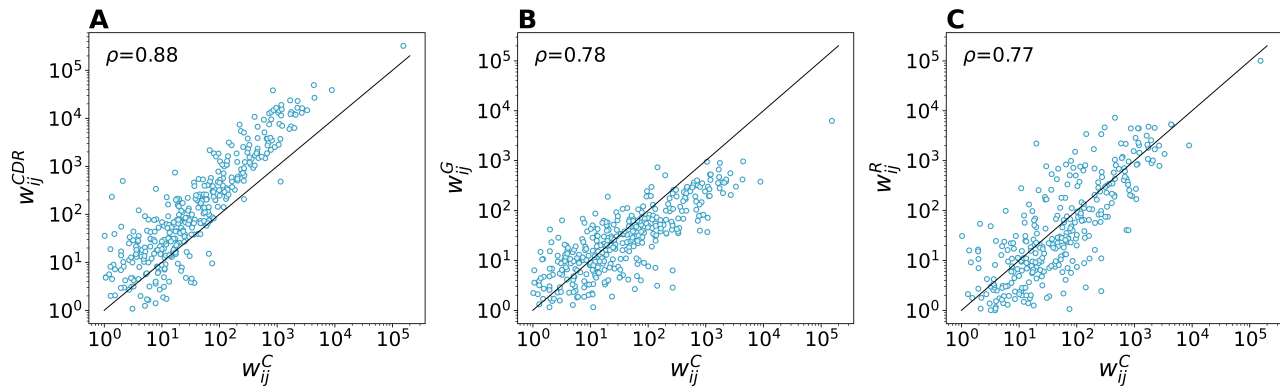

**Fig. 4. Comparison of mobility flows against the census network.** Relationship between census flows  $w_{ij}^C$  (x-axis) and mobility flows in the CDR-informed network (A), gravity network (B), and radiation network (C). Spearman's  $\rho$  correlation coefficient is reported.

313 ensemble, we compute the weekly number of new ZIKV infections (median number and 95%  
314 CI) of the model estimates. Before the simulations' selection based on the observed epidemic  
315 peak in Colombia, we first assess the performance of each mobility network in reproducing the  
316 outbreak at the national level. In Figure 5, we show the estimated weekly incidence of ZIKV  
317 infections (per 100,000 population) in comparison with the official surveillance data reported  
318 by Colombia's National Institute of Health (INS). For ease of comparison, the latter is scaled  
319 on the peak of the model estimates of the CDR-informed network. This is because the model  
320 projects a much larger number of infections than that captured by surveillance, as expected  
321 for a typically asymptomatic or mild disease. In particular, based on the official surveillance  
322 data, the epidemic peak occurred in week 2016-05 with an incidence of approximately 10 cases  
323 per 100,000 population, thus meaning two orders of magnitude of difference at the peak. To  
324 quantify the simulation's performance in capturing the temporal trend, we compute the Pear-  
325 son's  $r$  correlation between the estimated and observed ZIKV incidence at the country level  
326 between week 2015-40 to week 2016-40. This ranges between 0.88 for the radiation network  
327 to 0.92 for the CDR-informed network (all  $p < 0.01$ ). This is an indicator of the goodness  
328 of the performance of our model and epidemiological parameters in capturing the outbreak  
329 without applying any fit on the observed data. As for the epidemic peak, the model predictions  
330 are in good agreement and predict the peak within the confidence intervals. In particular,  
331 the model estimates of the radiation network predict the epidemic peak accurately at week  
332 2016-05, with 95%CI ranging from week 2015-51 to week 2016-14. The model estimates of the  
333 census and gravity networks predicts the epidemic peak with 1 week lag (2016-06), whereas the  
334 CDR-informed network with 4 weeks lags (2016-09).

335 In order to provide a more detailed analysis of the goodness of fit, among each stochastic  
336 ensemble output generated for each mobility network, we select only those stochastic realisations  
337 reproducing the observed epidemic peak in Colombia ( $\pm 1$  week). This additional calibration  
338 allows us to generate output ensembles with a narrow confidence in the epidemic timing and  
339 enables the analysis of results at the department level conditional to the occurred national peak  
340 timing. Findings are consistent when selecting stochastic realisations with a tolerance of  $\pm 2$   
341 weeks around the observed epidemic peak.

342 We excluded from this analysis those departments with less than 100 total ZIKV cases re-  
343 ported by the official surveillance data, which correspond to the departments of Nario, Vichada,  
344 Choco, Vaupes, and Guainia (cumulative cases are reported in Table S1 of the Supplementary  
345 Material). As for the Capital District Bogotá, ZIKV cases were not reported by the INS since

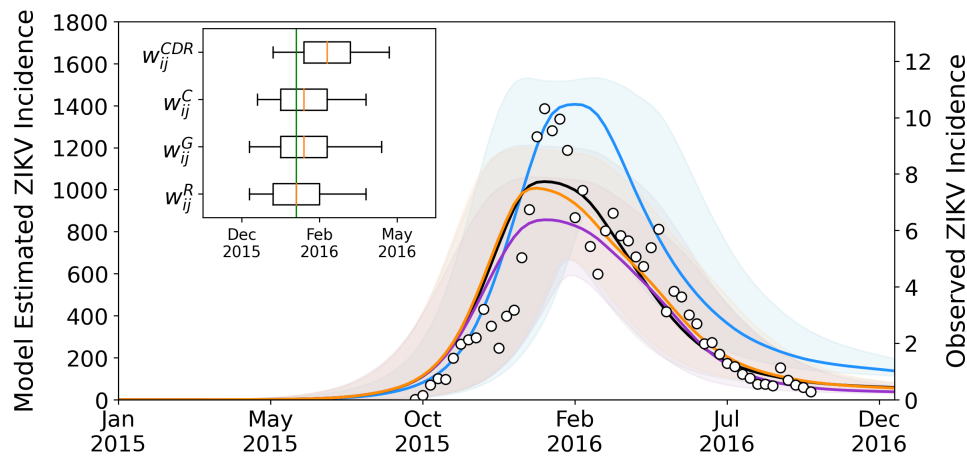

**Fig. 5. Comparison between the estimated and observed ZIKV incidence.** Weekly number of new ZIKV infections (per 100,000 population) as estimated from the stochastic ensemble output in the setting using the CDR-informed network (blue), the census network (black), the gravity network (orange), and the radiation network (purple). The bold line and shaded area refer to the median number of infections and 95% CI of the model estimates. Black dots correspond to the official ZIKV incidence (per 100,000 population) reported by Colombia’s National Institute of Health (right y-axis). For ease of comparison, surveillance data is scaled on the peak of the model estimates of the CDR-informed network. The inset graph shows the peak week as calculated from the model estimates. The observed epidemic peak was at week 2016-05 (green line).

346 the cases mostly originated in other reporting areas, and our model estimates capture this evi-  
 347 dence as no new ZIKV infections are generated in this area due to the adverse environmental  
 348 and socio-economic conditions. This further strengthens our epidemic modelling choices in in-  
 349 tegrating those factors relevant to reproduce the spread of ZIKV in Colombia. Model estimates  
 350 are of course affected by the data layers we integrated in our epidemic modelling approach.  
 351 As expected, model estimates are correlated with the rescaling factor  $r^{exp}$  regulating the pop-  
 352 ulation exposure to ZIKV due to environmental and socio-economic conditions (Spearman’s  $\rho$   
 353 ranging between 0.69 to 0.73). The model-based projections increase with higher values of  $r^{exp}$   
 354 as the size of the population participating in the infection dynamics increases (Figure S9 of the  
 355 Supplementary Material). In particular, we estimate through a linear regression fit a reporting  
 356 and detection rate ranging between  $0.51\% \pm 0.23\%$  for the gravity network to  $0.72\% \pm 0.32\%$   
 357 for the CDR-informed network (all  $p < 0.05$ ).

358 To quantify the simulation’s performance in capturing the epidemic timing observed in each  
 359 Colombian department, we calculate the Pearson’s  $r$  correlation between the model estimates  
 360 generated by each mobility network and the observed surveillance time series, as shown in Figure  
 361 6A. Namely we investigate the correlation between the model estimated weekly incidence and  
 362 the corresponding observed surveillance incidence in the time span ranging from week 2015-  
 363 40 to week 2016-40. The CDR-informed network predicts well the local outbreak in 20 out  
 364 of 27 departments (i.e. significant correlations), which are all situated in the northern and  
 365 central part of the country, where most of the population lives. In the remaining departments  
 366 where the CDR-informed network fails in reproducing the local outbreak, the other mobility  
 367 networks do so as well. This is more evident in the bottom row of Figure 6 where we compare  
 368 the correlation of the CDR-informed network with the correlation of the census network (B),

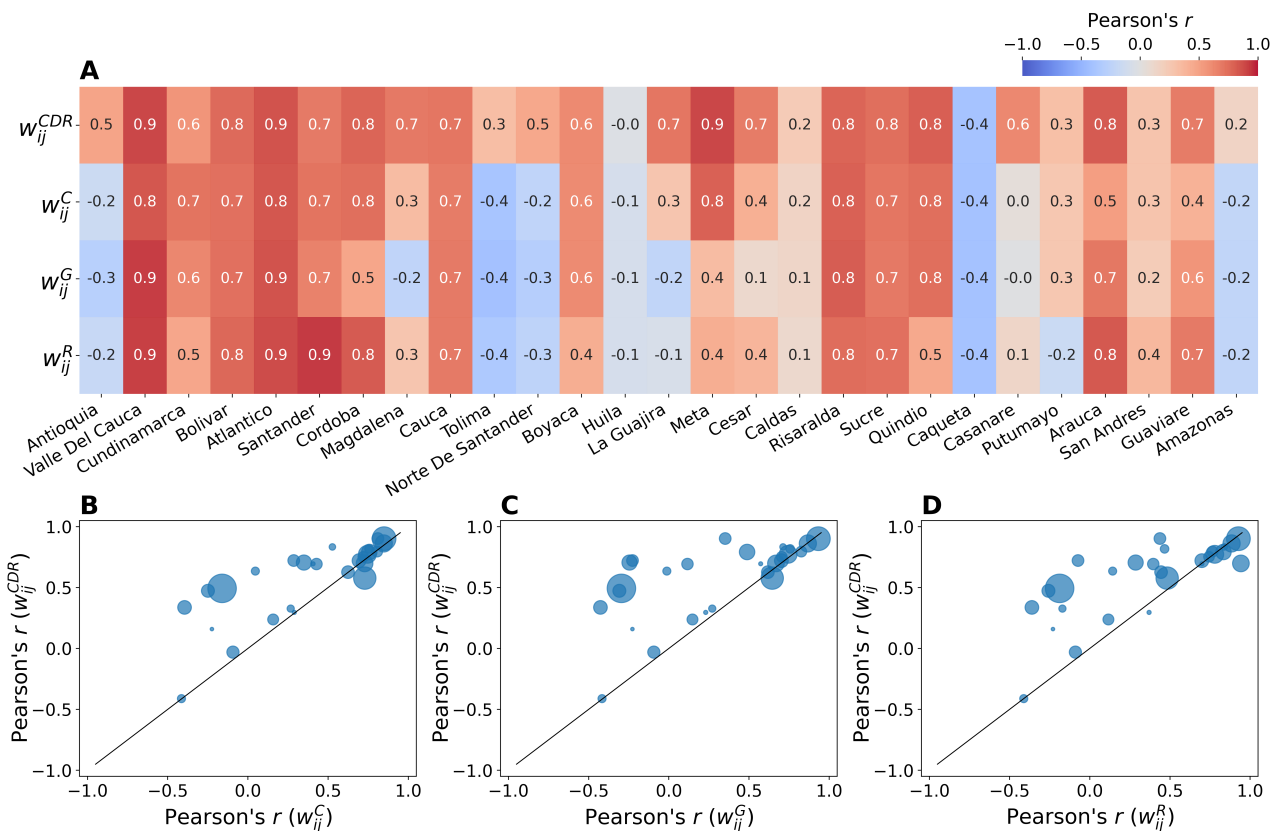

**Fig. 6. Correlation between model estimates and official surveillance data.** (A) The heatmap shows the Pearson's  $r$  correlation obtained by comparing the model estimates generated by each mobility network (on the y-axis) and the official surveillance times series by department (on the x-axis, sorted by population size). The bottom row shows the comparison between the Pearson's  $r$  correlation obtained for the CDR-informed network (y-axis) with the Pearson's  $r$  correlation obtained for the census network (B), the gravity network (C), and the radiation network (D). Point size corresponds to population size.

369 the gravity network (C), and the radiation network (D), by population size. Compared to  
 370 the CDR-informed network, the performance of the other mobility networks is comparatively  
 371 similar or substantially lower, with no added value in predicting the ZIKV outbreak at the level  
 372 of departments.

373 We investigate this further by looking at the main characteristics of the mobility networks,  
 374 i.e. node degree, total volume (traffic), and population size, as shown in Figure 7. Here  
 375 we observe that in the CDR-informed network (Figure 7A) correlations are lower in those  
 376 departments with smaller node degree, lower traffic and smaller population size, which is the  
 377 case of the departments of Putumayo, Amazonas, and San Andres. On the contrary, the  
 378 performance of the other mobility networks is very heterogeneous: departments with small  
 379 values of node degree, traffic and population, reach good results, and vice versa departments  
 380 with high values perform worse.

## 381 4 Discussion

382 We assessed the potential benefits of integrating aggregated CDR-derived mobility into a spa-  
 383 tially structured epidemic model to predict the Zika virus outbreak in Colombia in 2015-2016.

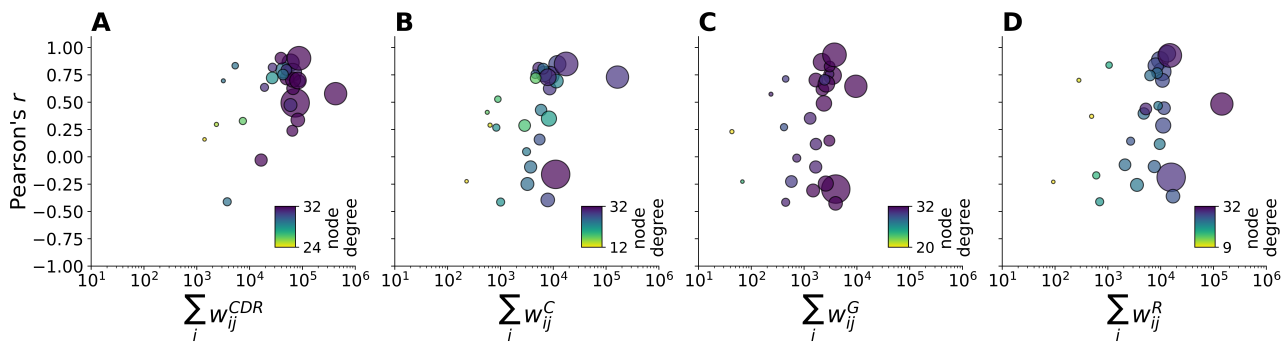

**Fig. 7. Correlation by main properties of mobility networks.** The plots show the Pearson's  $r$  correlation (y-axis) by the total outflows  $\sum_i w_{ij}$  of the CDR-informed network (A), census network (B), gravity network (C), and radiation network (D). Point size corresponds to population size. Colour code corresponds to node degree. Note that the scale of the colorbar changes across subplots in order to highlight the variability across networks.

Human mobility is in fact a key driver of ZIKV spread and integrating this variable into spatial models can provide valuable insights for epidemic preparedness and response [11]. Timely, accurate, and comparative data on human mobility is therefore of paramount importance. For this, we compared different sources of human mobility and explored whether the discrepancies between networks affect the epidemic outcomes. To simulate the spread of ZIKV at sub-national level in Colombia, we employed a stochastic metapopulation epidemic model for vector-borne disease. Following the state-of-the-art computational modelling approach developed by Zhang et al. [35], our model integrates detailed data on the population, the spatial heterogeneity of the mosquito abundance, and the exposure of the population to the virus due to environmental and socio-economic factors. Moreover, we employed the simulation outputs of the epidemic model by Zhang et al. [35] as initialization of our epidemic model to overcome the lack of official surveillance data in the initial phase of the ZIKV outbreak. This allows us to inform our epidemic model with the travel-associated ZIKV infections entering Colombia and potentially triggering ZIKV transmission depending on the local conditions. Given the same modelling settings (i.e. initial conditions and epidemiological parameters), we performed in-silico simulations for each mobility network and assessed their performance in reproducing the local outbreak as reported by the official surveillance data from the Colombia's National Institute of Health.

First, we showed the performance of our epidemic modelling approach in predicting the ZIKV outbreak at the national level without fitting the model projections on the observed data. Remarkably, we found the model estimates to be strongly correlated with the official surveillance data: the highest correlation is obtained for the CDR-informed network (Pearson's  $r=0.92$ ), but comparatively similar for the other mobility networks. Moreover, our model estimates do not report ZIKV infections in the Capital District Bogotá, in agreement with the official surveillance data, as the environmental and socio-economic conditions are adverse to local ZIKV spread. This allows us to prove the strength of our epidemic modelling choices in integrating those factors relevant to predicting the ZIKV outbreak in Colombia and to therefore focus on the impact of the human mobility patterns to capture the spatial ZIKV spread, after the simulations' selection.

Second, the CDR-informed network predicts well the local outbreak in 20 out of 27 departments. When the model estimates of the CDR-informed network fail, this is consistent for all mobility networks, as in the case of the departments of Huila and Cauqueta. In particular, compared to the CDR-informed network, the performance of the other mobility networks is

416 either comparatively similar or substantially lower, with no added value in predicting the local  
417 epidemic. Specifically, we found that correlations are smaller for the CDR-informed network  
418 in those departments with smaller node degree, lower traffic, and smaller population size. This  
419 is the case of the departments of Putumayo, Amazonas, and San Andres. This latter is an  
420 archipelago approximately 750 km north of the Colombian mainland, thus having fewer con-  
421 nections and smaller movements with the other departments. On the contrary, the performance  
422 of the other mobility networks is very heterogeneous: departments with small values of node  
423 degree, traffic and population, show good correlation, and vice versa departments with high  
424 values perform worse.

425 This work comes with several limitations. First, official surveillance data on the ZIKV epi-  
426 demic suffer from several limitations. Traditional monitoring and reporting of ZIKV infections  
427 was not sufficient to capture the introduction of the virus in Colombia. According to genetic  
428 findings ZIKV circulated in the Americas since late 2013 [37], but official surveillance began  
429 much later in Colombia, in August 2015, months after the epidemic was confirmed in Brazil in  
430 May 2015. Moreover, the weekly epidemiological reports from the Colombian National Institute  
431 of Health are often inconsistent or inadequate with numbers of cases varying significantly over  
432 time and comparatively low detection of laboratory-confirmed cases. Underreporting due to  
433 the clinical similarities of mild symptoms associated with ZIKV, limited diagnostic capabilities,  
434 medically unattended cases, and asymptomatic infections, may have contributed significantly  
435 to underestimating the actual extent of the epidemic. This represents an additional challenge in  
436 our study as we use this dataset as a reference to assess the model performance in reproducing  
437 the ZIKV outbreak.

438 Second, the census data employed here refers to the 2005 Colombian census, that is ten  
439 years before the Zika virus outbreak in 2015-2016. More recent data may be able to better  
440 capture the mobility features of the population and therefore the spatial ZIKV spread. On the  
441 other hand, the census data consists of commuting patterns of workers and students who daily  
442 commute to their workplace or school. Although this is the official source for trip-level data, this  
443 type of mobility is limited to commuting only, typically centered on major urban centers, and  
444 may not be representative of the mobility in rural or distant areas. As an example, in our study  
445 the census network performs best in the department of Cundinamarca, which is the nearest  
446 department to the Capital District Bogotá. Here the commuting may represent the largest part  
447 of the mobility patterns and thus be captured well by census data. In this context, the CDR-  
448 informed network may be instead more representative in capturing different types of mobility  
449 and not only daily commuting patterns, although inevitably biased by population sampling and  
450 coverage. A recent study on the 2015-2016 Zika virus epidemic in Colombia showed that an  
451 ensemble modelling approach integrating multiple data sources for human mobility, including  
452 CDR-derived mobility, is prominent to forecast an emerging infectious disease like Zika [46].

453 Our modelling approach also contains assumptions and approximations as discussed in  
454 Zhang et al. [35]. The transmission model has been calibrated by using data from the French  
455 Polynesia outbreak in 2013-2014 and the expressions for temperature dependence of transmis-  
456 sibility are modelled on dengue virus data. Secondary modes of transmission, e.g. perinatal  
457 or blood transmission, are not incorporated into the model. Mosquito abundance relies on the  
458 mosquito presence/absence maps that come with further limitations [10, 47, 48]. Finally, we do  
459 not model public health interventions to control the vector population or behavioural changes  
460 due to increased awareness, which we know might be a key aspect in shaping the course of  
461 epidemics.

462 Though the Zika virus outbreak modelled in this work is over in Colombia, in 2021 there  
463 are still many countries with autochthonous mosquito-borne transmission – a threat that is

464 increasing due to climate change. The response to many vector-borne diseases could benefit  
465 from the proposed modelling approach which should be part of epidemic response toolkits of  
466 public health authorities. Furthermore, in the ongoing COVID-19 pandemic, we believe this  
467 work is relevant not only because of the proposed methodologies, but also as it contributes to  
468 the ongoing discussion on the value of aggregated mobility estimates from CDRs data that, with  
469 proper data protection and data privacy mechanisms, can be used for social impact applications  
470 and humanitarian action [28].

## References

- [1] Zika virus, Key Facts. Available at: <https://www.who.int/news-room/fact-sheets/detail/zika-virus>;
- [2] World Health Organization. WHO Director-General summarizes the outcome of the Emergency Committee regarding clusters of microcephaly and Guillain-Barré syndrome. *Saudi medical journal*. 2016;37(3):334.
- [3] Chouin-Carneiro T, Vega-Rua A, Vazeille M, Yebakima A, Girod R, Goindin D, et al. Differential Susceptibilities of *Aedes aegypti* and *Aedes albopictus* from the Americas to Zika Virus. *PLoS neglected tropical diseases*. 2016;10(3):e0004543.
- [4] Grard G, Caron M, Mombo IM, Nkoghe D, Ondo SM, Jiolle D, et al. Zika virus in Gabon (Central Africa) – 2007: a new threat from *Aedes albopictus*? *PLoS neglected tropical diseases*. 2014;8(2):e2681.
- [5] Besnard M, Lastere S, Teissier A, Cao-Lormeau V, Musso D, et al. Evidence of perinatal transmission of Zika virus, French Polynesia, December 2013 and February 2014. *Euro surveill*. 2014;19(13):20751.
- [6] D’Ortenzio E, Matheron S, de Lamballerie X, Hubert B, Piorkowski G, Maquart M, et al. Evidence of sexual transmission of Zika virus. *New England Journal of Medicine*. 2016;374(22):2195–2198.
- [7] Mlakar J, Korva M, Tul N, Popović M, Poljšak-Prijatelj M, Mraz J, et al. Zika virus associated with microcephaly. *N Engl J Med*. 2016;2016(374):951–958.
- [8] Yakob L, Kucharski A, Hue S, Edmunds WJ. Low risk of a sexually-transmitted Zika virus outbreak. *The Lancet infectious diseases*. 2016;16(10):1100–1102.
- [9] Musso D, Nhan T, Robin E, Roche C, Bierlaire D, Zisou K, et al. Potential for Zika virus transmission through blood transfusion demonstrated during an outbreak in French Polynesia, November 2013 to February 2014. *Euro Surveill*. 2014;19(14):20761.
- [10] Kraemer MU, Sinka ME, Duda KA, Mylne AQ, Shearer FM, Barker CM, et al. The global distribution of the arbovirus vectors *Aedes aegypti* and *Ae. albopictus*. *Elife*. 2015;4:e08347.
- [11] Li SL, Messina JP, Pybus OG, Kraemer MU, Gardner L. A review of models applied to the geographic spread of Zika virus. *Transactions of The Royal Society of Tropical Medicine and Hygiene*. 2021;.

- [12] Wesolowski A, Buckee CO, Engø-Monsen K, Metcalf C. Connecting mobility to infectious diseases: the promise and limits of mobile phone data. *The Journal of Infectious Diseases*. 2016;214(suppl\_4):S414–S420.
- [13] Ajelli M, Gonçalves B, Balcan D, Colizza V, Hu H, Ramasco JJ, et al. Comparing large-scale computational approaches to epidemic modeling: agent-based versus structured metapopulation models. *BMC infectious diseases*. 2010;10(1):190.
- [14] Tizzoni M, Bajardi P, Decuyper A, King GKK, Schneider CM, Blondel V, et al. On the use of human mobility proxies for modeling epidemics. *PLoS computational biology*. 2014;10(7):e1003716.
- [15] Barbosa H, Barthelemy M, Ghoshal G, James CR, Lenormand M, Louail T, et al. Human mobility: Models and applications. *Physics Reports*. 2018;734:1–74.
- [16] Blondel VD, Decuyper A, Krings G. A survey of results on mobile phone datasets analysis. *EPJ Data Science*. 2015;4(1):10.
- [17] Wesolowski A, Eagle N, Tatem AJ, Smith DL, Noor AM, Snow RW, et al. Quantifying the impact of human mobility on malaria. *Science*. 2012;338(6104):267–270.
- [18] Tatem AJ, Huang Z, Narib C, Kumar U, Kandula D, Pindolia DK, et al. Integrating rapid risk mapping and mobile phone call record data for strategic malaria elimination planning. *Malaria journal*. 2014;13(1):52.
- [19] Wesolowski A, Qureshi T, Boni MF, Sundsøy PR, Johansson MA, Rasheed SB, et al. Impact of human mobility on the emergence of dengue epidemics in Pakistan. *Proceedings of the National Academy of Sciences*. 2015;112(38):11887–11892.
- [20] Bengtsson L, Gaudart J, Lu X, Moore S, Wetter E, Sallah K, et al. Using mobile phone data to predict the spatial spread of cholera. *Scientific reports*. 2015;5.
- [21] Wesolowski A, Metcalf C, Eagle N, Kombich J, Grenfell BT, Bjørnstad ON, et al. Quantifying seasonal population fluxes driving rubella transmission dynamics using mobile phone data. *Proceedings of the National Academy of Sciences*. 2015;112(35):11114–11119.
- [22] Wesolowski A, Buckee CO, Bengtsson L, Wetter E, Lu X, Tatem AJ. Commentary: containing the Ebola outbreak—the potential and challenge of mobile network data. *PLoS currents*. 2014;6.
- [23] Peak CM, Wesolowski A, zu Erbach-Schoenberg E, Tatem AJ, Wetter E, Lu X, et al. Population mobility reductions associated with travel restrictions during the Ebola epidemic in Sierra Leone: use of mobile phone data. *International journal of epidemiology*. 2018;47(5):1562–1570.
- [24] Zhou Y, Xu R, Hu D, Yue Y, Li Q, Xia J. Effects of human mobility restrictions on the spread of COVID-19 in Shenzhen, China: a modelling study using mobile phone data. *The Lancet Digital Health*. 2020;2(8):e417–e424.
- [25] Gozzi N, Tizzoni M, Chinazzi M, Ferres L, Vespignani A, Perra N. Estimating the effect of social inequalities on the mitigation of COVID-19 across communities in Santiago de Chile. *Nature Communications*. 2021;12(1):1–9.



- [26] Oliver N, Lepri B, Sterly H, Lambiotte R, Deletaille S, De Nadai M, et al.. Mobile phone data for informing public health actions across the COVID-19 pandemic life cycle; 2020.
- [27] Grantz KH, Meredith HR, Cummings DA, Metcalf CJE, Grenfell BT, Giles JR, et al. The use of mobile phone data to inform analysis of COVID-19 pandemic epidemiology. *Nature communications*. 2020;11(1):1–8.
- [28] Buckee CO, Balsari S, Chan J, Crosas M, Dominici F, Gasser U, et al. Aggregated mobility data could help fight COVID-19. *Science*. 2020;.
- [29] Pan American Health Organization. Zika cumulative cases. Available at: [https://www.paho.org/hq/index.php?option=com\\_content&view=article&id=12390:zika-cumulative-cases&Itemid=42090&lang=en;](https://www.paho.org/hq/index.php?option=com_content&view=article&id=12390:zika-cumulative-cases&Itemid=42090&lang=en;).
- [30] Coscia M, Hausmann R. Evidence that calls-based and mobility networks are isomorphic. *PloS one*. 2015;10(12):e0145091.
- [31] Departamento Administrativo Nacional de Estadística (DANE). Available at: <http://www.dane.gov.co;>.
- [32] Balcan D, Colizza V, Gonçalves B, Hu H, Ramasco JJ, Vespignani A. Multiscale mobility networks and the spatial spreading of infectious diseases. *Proceedings of the National Academy of Sciences*. 2009;106(51):21484–21489.
- [33] Simini F, González MC, Maritan A, Barabási AL. A universal model for mobility and migration patterns. *arXiv preprint arXiv:11110586*. 2011;.
- [34] Balcan D, Gonçalves B, Hu H, Ramasco JJ, Colizza V, Vespignani A. Modeling the spatial spread of infectious diseases: The GLocal Epidemic and Mobility computational model. *Journal of computational science*. 2010;1(3):132–145.
- [35] Zhang Q, Sun K, Chinazzi M, y Piontti AP, Dean NE, Rojas DP, et al. Spread of Zika virus in the Americas. *Proceedings of the national academy of sciences*. 2017;114(22):E4334–E4343.
- [36] Black A, Moncla LH, Laiton-Donato K, Potter B, Pardo L, Rico A, et al. Genomic epidemiology supports multiple introductions and cryptic transmission of Zika virus in Colombia. *BMC infectious diseases*. 2019;19(1):1–11.
- [37] Faria NR, Quick J, Claro I, Theze J, de Jesus JG, Giovanetti M, et al. Establishment and cryptic transmission of Zika virus in Brazil and the Americas. *Nature*. 2017;546(7658):406.
- [38] Weekly epidemiological reports from the Colombian National Institute of Health (INS). Available at: <http://www.ins.gov.co/buscador-eventos/BoletinEpidemiologico/Forms/AllItems.aspx;>.
- [39] Duffy MR, Chen TH, Hancock WT, Powers AM, Kool JL, Lanciotti RS, et al. Zika virus outbreak on Yap Island, federated states of Micronesia. *New England Journal of Medicine*. 2009;360(24):2536–2543.
- [40] Aubry M, Teissier A, Huart M, Merceron S, Vanhomwegen J, Roche C, et al. Zika virus seroprevalence, French Polynesia, 2014–2015. *Emerging infectious diseases*. 2017;23(4):669.

- [41] Ferguson NM, Cucunubá ZM, Dorigatti I, Nedjati-Gilani GL, Donnelly CA, Basáñez MG, et al. Countering the zika epidemic in latin america. *Science*. 2016;353(6297):353–354.
- [42] Johansson MA, Powers AM, Pesik N, Cohen NJ, Staples JE. Nowcasting the spread of chikungunya virus in the Americas. *PloS one*. 2014;9(8):e104915.
- [43] Lambrechts L, Paaijmans KP, Fansiri T, Carrington LB, Kramer LD, Thomas MB, et al. Impact of daily temperature fluctuations on dengue virus transmission by *Aedes aegypti*. *Proceedings of the National Academy of Sciences*. 2011;108(18):7460–7465.
- [44] Colizza V, Vespignani A. Epidemic modeling in metapopulation systems with heterogeneous coupling pattern: Theory and simulations. *Journal of theoretical biology*. 2008;251(3):450–467.
- [45] Sun K, Zhang Q, Pastore-Piontti A, Chinazzi M, Mistry D, Dean NE, et al. Quantifying the risk of local Zika virus transmission in the contiguous US during the 2015–2016 ZIKV epidemic. *BMC medicine*. 2018;16(1):195.
- [46] Oidtman RJ, Omodei E, Kraemer MU, Casteneda-Orjuela CA, Cruz-Rivera E, Misnaza-Castrillon S, et al. Trade-offs between individual and ensemble forecasts of an emerging infectious disease. *medRxiv*. 2021;.
- [47] Messina JP, Kraemer MU, Brady OJ, Pigott DM, Shearer FM, Weiss DJ, et al. Mapping global environmental suitability for Zika virus. *elife*. 2016;5:e15272.
- [48] Kraemer MU, Sinka ME, Duda KA, Mylne A, Shearer FM, Brady OJ, et al. The global compendium of *Aedes aegypti* and *Ae. albopictus* occurrence. *Scientific Data*. 2015;2:sdata201535.

## **Author Contributions**

Conceptualization: DPe, MLO, MT, AV.

Data curation: DPe.

Formal analysis: DPe.

Investigation: DPe, MT, AV.

Methodology: DPe, MT, AV.

Resources: EFM, APyP, QZ.

Software: DPe.

Supervision: MLO, DPa, MT, AV.

Validation: DPe, MT.

Visualization: DPe.

Writing – original draft: DPe.

Writing – review & editing: DPe, EFM, APyP, QZ, MLO, DPa, MT, AV.

## **Data availability statement**

The mobile phone data used in this study is proprietary and subject to strict privacy regulations. Access was granted after signing a non-disclosure agreement (NDA) with the proprietor, who anonymized and aggregated the original data before giving access to the authors. The mobile phone data could be available on request after a NDA is signed and discussed.

## **Competing Interests**

The authors have declared that no competing interests exist.

## **Ethics approval**

No IRB approvals were necessary.
